# Supplementary material for: Is Caperatic Acid the Only Compound Responsible for Activity of Lichen Platismatia glauca within the Nervous System?
Source: MDPI journal article supplement (doi:10.3390/antiox11102069), 2022-10-20
Supplement: s1 [file s1]

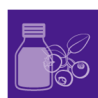

# Supplementary Materials: Is caperatic acid the only compound responsible for activity of lichen *Platismatia glauca* within the nervous system?

Elżbieta Studzińska-Sroka, Aleksandra Majchrzak-Celińska, Monika Bańdurska, Natalia Rosiak, Dominik Szwajgier, Ewa Baranowska-Wójcik, Marcin Szymański, Wojciech Gruszka and Judyta Cielecka-Piontek

**Table S1.** Chemical shifts data of caperatic acid in acetone- $d_6$  ( $^1H$ -,  $^{13}C$  NMR; 700 MHz).

| Position | Caperatic acid   |                  |                       |     |
|----------|------------------|------------------|-----------------------|-----|
|          | $\delta_C$ (ppm) | $\delta_H$ (ppm) | multiplicity, J in Hz |     |
| 1        | 169.93           | -                | -                     | -   |
| 2        | 40.32            | 3.10             | d (16.1)              | 2H  |
| 3        | 74.85            | -                | -                     | -   |
| 4        | 52.27            | 2.76             | d (16.8)              |     |
| 5-17     | 21.90-31.26      | 1.30             | dd (11.9, 2.8)        | H   |
| 18       | 12.98            | 0.86             | bs                    | 26H |
| 19       | 173.43           | -                | t                     | 3H  |
| 20       | 172.49           | -                | -                     | -   |
| 21       | 50.45            | 3.60             | -                     | -   |
|          |                  |                  | s                     | 3H  |

d - doublet; dd - doublet of doublet; s - singlet; bs - broad singlet; t – triplet.  $^1H$ - and  $^{13}C$ -NMR spectra were recorded at 700 MHz on a Bruker AVANCE III 700 NMR spectrometer. Data was comparable to the published values (Huneck & Yoshimura 1996).

**Table S2.** Selected characteristic bands of DCM, Ace, MeOH, MeOH-H<sub>2</sub>O, H<sub>2</sub>O extract, caperatic acid, atranorin and methyl  $\beta$ -orcinolcarboxylate.

| Extract     | Caperatic acid | Atranorin | Methyl $\beta$ -orcinolcarboxylate |
|-------------|----------------|-----------|------------------------------------|
| DCM extract | 536            |           |                                    |
|             | 795            | 795       |                                    |
|             | 808            | 808       |                                    |
|             | 941            |           |                                    |
|             | 1028           |           | 1028                               |
|             | 1074           | 1070      |                                    |
|             | 1113           |           |                                    |
|             | 1155           |           | 1155                               |
|             | 1369           |           |                                    |

|              |      |      |      |      |
|--------------|------|------|------|------|
|              | 1410 | 1410 |      |      |
|              | 1447 | 1447 |      |      |
|              | 1576 |      | 1576 |      |
|              | 1620 |      | 1620 |      |
|              | 1682 | 1682 |      |      |
|              | 1740 | 1740 |      |      |
|              | 2849 | 2849 |      |      |
|              | 2884 | 2884 |      |      |
|              | 2916 | 2916 |      |      |
|              | 2957 | 2957 |      |      |
| Ace extract  | 534  | 534  |      |      |
|              | 642  | 642  |      |      |
|              | 721  | 721  |      |      |
|              | 795  | 795  |      |      |
|              | 853  | 853  |      |      |
|              | 941  | 941  |      |      |
|              | 1078 |      | 1070 |      |
|              | 1111 |      | 1107 |      |
|              | 1153 |      | 1161 |      |
|              | 1182 | 1182 |      |      |
|              | 1250 | 1250 |      |      |
|              | 1261 |      | 1260 |      |
|              | 1287 | 1287 |      |      |
|              | 1304 | 1304 |      |      |
|              | 1369 | 1369 |      |      |
|              | 1410 | 1410 |      |      |
|              | 1447 | 1447 |      |      |
|              | 1578 |      | 1574 |      |
|              | 1618 |      | 1620 |      |
|              | 1647 |      | 1653 |      |
|              | 1686 | 1686 |      |      |
|              | 1738 | 1738 |      |      |
|              | 2849 | 2849 |      |      |
|              | 2884 | 2884 |      |      |
|              | 2914 | 2914 |      |      |
|              | 2957 | 2957 |      |      |
| MeOH extract | 640  | 640  |      |      |
|              | 862  |      | 862  |      |
|              | 937  |      |      | 937  |
|              | 986  |      |      | 986  |
|              | 1207 |      | 1204 |      |
|              | 1368 |      |      | 1366 |

|                               |      |      |      |
|-------------------------------|------|------|------|
|                               | 1410 | 1410 |      |
|                               | 1445 | 1445 |      |
|                               | 1618 |      | 1620 |
|                               | 1651 |      | 1653 |
|                               | 1686 | 1684 |      |
|                               | 1734 | 1740 |      |
|                               | 2849 | 2849 |      |
|                               | 2884 | 2884 |      |
|                               | 2918 | 2918 |      |
| MeOH-H <sub>2</sub> O extract | 1250 | 1250 |      |
|                               | 1368 | 1369 |      |
|                               | 1408 | 1410 |      |
|                               | 1682 | 1684 |      |
|                               | 1734 | 1738 |      |
|                               | 2849 | 2849 |      |
|                               | 2884 | 2884 |      |
|                               | 2916 | 2916 |      |
| H <sub>2</sub> O extract      | 870  | 856  |      |
|                               | 1082 | 1082 |      |
|                               | 1404 |      |      |
|                               | 1672 | 1672 |      |
|                               | 1724 | 1724 |      |
